# Supplementary material
Source: publisher figshare collection journal article supplement (https://tandf.figshare.com/ndownloader/files/18174830)
Supplement: Supplementary file 1 [file 18174830]

**Agar: a natural and environmentally-friendly support composed with copper oxide nanoparticles for the green synthesis of 1,2,3–triazoles**

Ali Maleki*, Morteza Panahzadeh, Reza Eivazzadeh-keihan

*Catalysts and Organic Synthesis Research Laboratory, Department of Chemistry, Iran University of Science and Technology, Tehran 16846-13114, Iran*

**Corresponding author. E-mail:* [*maleki@iust.ac.ir*](mailto:maleki@iust.ac.ir)*; Fax: +98-21-73021584; Tel: +98-21-73228313*

**Characterization Data:**

**1-Benzyl-4-phenyl-1*H*-1,2,3-triazole**

White powder**.** Mp: 128-130 °C. 1H NMR: (500 MHz, CDCl3): δ: 5.60 (s, 2H, CH2), 7.33-7.35 (m, 3H, Haromatic), 7.4-7.44 (m, 5H, Haromatic), 7.68 (s, 1H, 5-H), 7.81-7.83 (d, 2H, Haromatic).


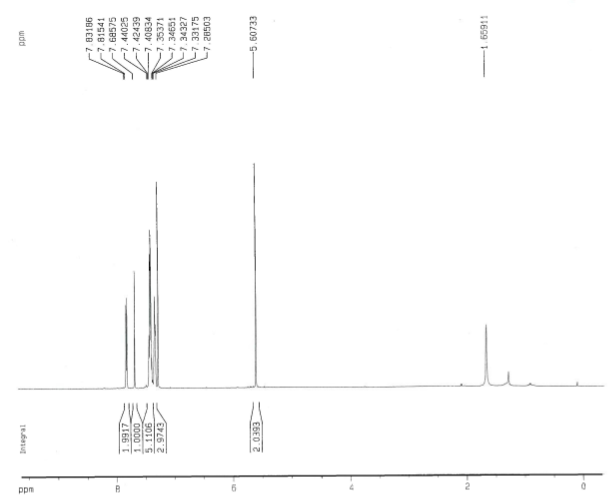


**Figure 1.** 1H NMR spectrum of the product.


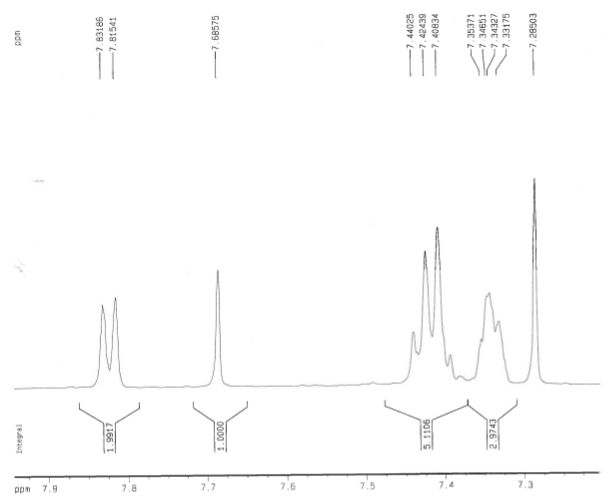


**Figure 2.** Expanded 1H NMR spectrum of the product.
